# Supplementary material
Source: MDPI journal article supplement (https://www.mdpi.com/2311-7524/8/11/1061)
Supplement: s1 [file s1]

Supplementary Table S3 Statistics on fruit botanical characteristics of 9 mutants

| Mutants | Fruit length (cm)       | Fruit diameter (cm)    | Length /diameter        | Fruit weight (g)       | Fruit colour | Fragrance | Deformed |
|---------|-------------------------|------------------------|-------------------------|------------------------|--------------|-----------|----------|
| DL      | 1.6±0.15 <sup>bc</sup>  | 1.7±0.11 <sup>bc</sup> | 0.94±0.12 <sup>ab</sup> | 1.05±0.11 <sup>b</sup> | white        | peach     | no       |
| YL      | 1.4±0.18 <sup>c</sup>   | 1.83±0.06 <sup>b</sup> | 0.76±0.08 <sup>b</sup>  | 1.05±0.07 <sup>b</sup> | white        | peach     | no       |
| WL      | 1.1±0.20 <sup>d</sup>   | 1.37±0.15 <sup>d</sup> | 0.82±0.14 <sup>ab</sup> | 0.68±0.09 <sup>d</sup> | white        | peach     | yes      |
| RL      | 2.03±0.06 <sup>a</sup>  | 2.17±0.08 <sup>a</sup> | 0.94±0.02 <sup>ab</sup> | 1.2±0.05 <sup>a</sup>  | white        | peach     | no       |
| NL      | 1.1±0.14 <sup>d</sup>   | 1.2±0.12 <sup>c</sup>  | 0.92±0.09 <sup>ab</sup> | 0.64±0.12 <sup>d</sup> | white        | peach     | yes      |
| SL      | 1.6±0.16 <sup>bc</sup>  | 1.83±0.15 <sup>b</sup> | 0.87±0.03 <sup>ab</sup> | 1.07±0.08 <sup>b</sup> | white        | peach     | no       |
| LL      | 1.67±0.15 <sup>b</sup>  | 1.6±0.13 <sup>c</sup>  | 1.04±0.16 <sup>a</sup>  | 1.02±0.13 <sup>b</sup> | white        | peach     | no       |
| DP      | 1.47±0.06 <sup>bc</sup> | 1.63±0.09 <sup>c</sup> | 0.9±0.03 <sup>ab</sup>  | 0.86±0.11 <sup>c</sup> | white        | peach     | yes      |
| CP      | 1.4±0.12 <sup>c</sup>   | 1.6±0.13 <sup>c</sup>  | 0.88±0.06 <sup>ab</sup> | 0.72±0.13 <sup>d</sup> | white        | peach     | no       |
| WT      | 1.63±0.11 <sup>b</sup>  | 1.67±0.05 <sup>c</sup> | 0.98±0.13 <sup>ab</sup> | 1.04±0.08 <sup>b</sup> | white        | peach     | no       |

Note: Values represent mean ± SE; Different lowercase letters indicate significant differences among treatments according to LSD test ( $P<0.05$ ).
