# Supplementary material
Source: MDPI journal article supplement (https://www.mdpi.com/2311-7524/8/11/1061)
Supplement: s1 [file s1]

Supplementary Table S4 Determination of L\*, a\*, and b\* values of 11 mutant leaves in *F. nilgerrensis*

| Mutants | L*                       | a*                       | b*                       |
|---------|--------------------------|--------------------------|--------------------------|
| DL      | 31.57±0.22 <sup>f</sup>  | -7.7±0.24 <sup>a</sup>   | 11.9±0.35 <sup>g</sup>   |
| YL      | 63.23±0.76 <sup>a</sup>  | -15.88±0.21 <sup>g</sup> | 49.89±0.20 <sup>a</sup>  |
| CL      | 33.43±0.52 <sup>c</sup>  | -9.58±0.06 <sup>c</sup>  | 13.66±0.28 <sup>h</sup>  |
| WL      | 40.87±0.66 <sup>b</sup>  | -13.39±0.31 <sup>c</sup> | 25.43±0.46 <sup>b</sup>  |
| RL      | 32.56±0.86 <sup>f</sup>  | -8.29±0.14 <sup>b</sup>  | 12.15±0.29 <sup>h</sup>  |
| NL      | 38.66±0.49 <sup>c</sup>  | -14.56±0.19 <sup>f</sup> | 21.76±0.07 <sup>de</sup> |
| SGL     | 38.62±0.28 <sup>c</sup>  | -12.34±0.29 <sup>d</sup> | 19.13±0.39 <sup>f</sup>  |
| SL      | 38.65±0.34 <sup>c</sup>  | -13.67±0.29 <sup>c</sup> | 21.42±0.40 <sup>de</sup> |
| LL      | 39.77±0.20 <sup>b</sup>  | -13.87±0.22 <sup>c</sup> | 21.87±0.08 <sup>de</sup> |
| DP      | 37.11±0.30 <sup>d</sup>  | -15.16±0.18 <sup>f</sup> | 22.25±0.40 <sup>c</sup>  |
| CP      | 37.88±0.28 <sup>cd</sup> | -14.96±0.20 <sup>f</sup> | 22.11±0.22 <sup>cd</sup> |
| WT      | 38.27±0.52 <sup>c</sup>  | -14.82±0.34 <sup>f</sup> | 21.69±0.48 <sup>c</sup>  |

Note: Values represent mean ± SE; Different lowercase letters indicate significant differences among treatments according to LSD test ( $P<0.05$ ).
