# Supplementary material
Source: MDPI journal article supplement (https://www.mdpi.com/2311-7524/8/11/1061)
Supplement: s1 [file s1]

Supplementary Table S2 Statistics on flower characteristics of 10 mutants

| Mutants | Flower color | Inflorescence | No. of flowers | Flower diameter/cm | No. of petals | No. of calyxes | Stamens |
|---------|--------------|---------------|----------------|--------------------|---------------|----------------|---------|
| DL      | White        | 1             | 2-3            | 1.9-2.3            | 5             | 10             | 20-23   |
| YL      | White        | 1             | 1-3            | 1.6-1.9            | 5             | 10             | 20      |
| CL      | No flower    |               |                |                    |               |                |         |
| WL      | White        | 1             | 2-4            | 2.4                | 7-8           | 14-16          | 25-30   |
| RL      | White        | 1             | 1-2            | 2                  | 5-6           | 10-12          | 20-24   |
| NL      | White        | 1             | 5-6            | 1.5-1.4            | 5             | 10             | 19-20   |
| SGL     | White        | 1-2           | 6-10           | 1.7-2.2            | 5             | 5              | 14-16   |
| LL      | White        | 1             | 7              | 2.3-2.5            | 6-8           | 12-16          | 24-30   |
| SL      | White        | 2-3           | 4-9            | 2.2-2.6            | 6-7           | 11-13          | 19-23   |
| DP      | White        | 1             | 2              | 1.9-2              | 5-6           | 10-11          | 17-24   |
| CP      | White        | 1             | 3-4            | 1.7-2.1            | 5-6           | 10-12          | 21-23   |
| WT      | White        | 1             | 2-4            | 1.7-2.3            | 5             | 10-12          | 18-24   |
